# Supplementary material for: Beyond translesion synthesis: polymerase κ fidelity as a potential determinant of microsatellite stability
Source: PubMed Central journal article supplement — Nucleic Acids Res. 2011 Oct 22;40(4):1636–47. doi: 10.1093/nar/gkr889 (PMC3287198; doi:10.1093/nar/gkr889), 2011-10-22
Supplement: supp_gkr889_nar-02148-h-2011-File007.pdf [file supp_gkr889_nar-02148-h-2011-File007.pdf]

**Table S1. Specificity of Detectable Coding Region Mutational Events for [GT]<sub>10</sub>, [TC]<sub>11</sub>, and [T]<sub>8</sub> Microsatellite-Containing Templates**

| HSV-tk Mutation Frequency x 10 <sup>-4</sup> |                 |                  |                  |
|----------------------------------------------|-----------------|------------------|------------------|
|                                              | Pol δ4          | Pol κ            | Pol η            |
| <b>Coding Pol EFest (No. obs.)</b>           | <b>4.5 (27)</b> | <b>120 (219)</b> | <b>380 (157)</b> |
| <b>FRAMESHIFT (No. obs.)</b>                 | <b>1.3 (8)</b>  | <b>104 (190)</b> | <b>180 (76)</b>  |
| Tandem Repeat                                | 0.50            | 72               | 85               |
| Mononucleotide Monitors                      | 0.50            | 72               | 80               |
| <i>Deletion</i>                              | <b>0.50</b>     | <b>70</b>        | <b>68</b>        |
| AA                                           | ---             | 8.2              | 46               |
| GG                                           | 0.17            | 28               | 7.3              |
| CC                                           | ---             | 31               | 4.8              |
| TT                                           | 0.33            | 2.2              | 4.8              |
| CCC                                          | ---             | 0.55             | 4.8              |
| <i>Insertion</i>                             | ---             | <b>1.6</b>       | <b>12</b>        |
| AA                                           | ---             | ---              | 2.4              |
| GG                                           | ---             | ---              | 2.4              |
| CC                                           | ---             | ---              | 2.4              |
| TT                                           | ---             | 1.6              | ---              |
| CCC                                          | ---             | ---              | 4.8              |
| Dinucleotide Monitors                        | ---             | 0.55             | 4.8              |
| Non repeated sequences                       | 0.83            | 32               | 99               |
| <i>Deletion</i>                              | <b>0.67</b>     | <b>28</b>        | <b>85</b>        |
| -A                                           | 0.50            | 1.6              | 27               |
| -G                                           | ---             | 16               | 19               |
| -C                                           | ---             | 3.3              | 7.3              |
| -T                                           | 0.17            | 7.1              | 31               |
| <i>Insertion</i>                             | <b>0.17</b>     | <b>3.3</b>       | <b>15</b>        |
| <b>BASE SUBSTITUTION (No. obs.)</b>          | <b>2.0 (12)</b> | <b>13 (23)</b>   | <b>150 (62)</b>  |
| Transition                                   | 1.5             | 5.5              | 75               |
| T → C                                        | ---             | ---              | 29               |
| C → T                                        | 1.3             | 3.8              | 31               |
| G → A                                        | 0.17            | 1.1              | 4.8              |
| A → G                                        | ---             | 0.55             | 9.7              |
| Transversion                                 | 0.50            | 7.1              | 75               |
| T → G                                        | ---             | 0.55             | 12               |
| T → A                                        | ---             | ---              | 2.4              |
| A → T                                        | ---             | ---              | 27               |
| A → C                                        | ---             | ---              | 12               |
| G → T                                        | 0.50            | 3.8              | 9.7              |
| G → C                                        | ---             | 1.6              | 2.4              |
| C → A                                        | ---             | 1.1              | 4.8              |
| C → G                                        | ---             | ---              | 4.8              |
| <b>OTHER<sup>a</sup> (No. obs.)</b>          | <b>1.2 (7)</b>  | <b>3.3 (6)</b>   | <b>46 (19)</b>   |

<sup>a</sup>Other mutational events include large deletions, large insertions, rearrangements, and tandem events.

**Table S2. Number of dinucleotide microsatellite alleles in the human reference genome (hg18)**

| <b>Number of Units</b> | <b>[GT/CA] count <sup>a</sup></b> | <b>Total count <sup>b</sup></b> |
|------------------------|-----------------------------------|---------------------------------|
| 5                      | 91,745                            | 238,803                         |
| 6                      | 39,388                            | 95,589                          |
| 7                      | 19,190                            | 47,059                          |
| 8                      | 10,606                            | 25,375                          |
| 9                      | 7,107                             | 15,590                          |
| 10                     | 5,555                             | 10,705                          |
| >10                    | 53,394                            | 73,135                          |
| Sum                    | 58,949                            | 506,256                         |

<sup>a</sup> Enumeration of pure, uninterrupted microsatellites above the threshold length

<sup>b</sup> Includes dinucleotides of all sequences: [GT/CA], [TC/AG], [AT/TA], and [GC/CG].
